# Supplementary material
Source: MDPI journal article supplement (https://www.mdpi.com/2410-3888/7/5/274)
Supplement: s1 [file s1]

# Anthropogenic Contaminants Shape the Fitness of the Endangered European Eel: A Machine Learning Approach

**Bastien Bourillon** <sup>1,†</sup>, **Eric Feunteun** <sup>1,2,\* ,†</sup>, **Anthony Acou** <sup>3</sup>, **Thomas Trancart** <sup>1</sup>, **Nils Teichert** <sup>1</sup>, **Claude Belpaire** <sup>4</sup>, **Sylvie Dufour** <sup>5</sup>, **Paco Bustamante** <sup>6,7</sup>, **Kim Aarestrup** <sup>8</sup>, **Alan Walker** <sup>9</sup> and **David Righton** <sup>9</sup>

- 1 Laboratoire Biologie des Organismes et Écosystèmes Aquatiques (BOREA),  
Muséum National d'Histoire Naturelle, UMR 8067 CNRS, Sorbonne Université, IRD 207,  
Université de Caen Normandie, Université des Antilles, Centre de Recherche et d'Enseignement sur les  
Systèmes Côtiers, station de biologie marine de Dinard, 38 rue du Port Blanc, 35800 Dinard, France
- 2 EPHE-PSL, Centre de Géocéologie Littorale, Boulevard de la mer, 35800 Dinard, France
- 3 UAR OFB-CNRS-MNHN PatriNat, station de biologie marine de Dinard, 38 rue du Port Blanc,  
35800 Dinard, France
- 4 Research Institute for Nature and Forest (INBO), Dwersbos 28, 1630 Linkebeek, Belgium
- 5 Laboratoire Biologie des Organismes et Écosystèmes Aquatiques (BOREA),  
Muséum National d'Histoire Naturelle, CNRS UMR 8067, Sorbonne Université, IRD 207,  
Université de Caen Normandie, Université des Antilles, 43 rue Cuvier, CEDEX 5,  
75231 Paris, France
- 6 Littoral, Environnement et Sociétés (LIENSs), UMR 7266 CNRS, La Rochelle Université, 2 rue Olympe de  
Gouges, 17000 La Rochelle, France
- 7 Institut Universitaire de France (IUF), 1 rue Descartes, 75005 Paris, France
- 8 DTU AQUA, National Institute of Aquatic Resources, Section for Freshwater Fisheries Ecology,  
Technical University of Denmark, Vejløvej 39, 8600 Silkeborg, Denmark
- 9 Centre for Environment, Fisheries and Aquaculture Science, Pakefield Road,  
Lowestoft NR33 0HT, Suffolk, UK
- \* Correspondence: [eric.feunteun@mnhn.fr](mailto:eric.feunteun@mnhn.fr)
- † These authors contributed equally to this work.

**Table S1.** Chemical contaminant concentrations and *A. crassus* abundance measured in the female silver eels sampled from each European catchment.

| Contami-<br>nant<br>Groups | Compo-<br>unds             | Catchments                                       |                                                 |                                                 |                                                 |                                                 |                                                 |                                                 |                                                 |                                                 |
|----------------------------|----------------------------|--------------------------------------------------|-------------------------------------------------|-------------------------------------------------|-------------------------------------------------|-------------------------------------------------|-------------------------------------------------|-------------------------------------------------|-------------------------------------------------|-------------------------------------------------|
|                            |                            | swSTO                                            | deGUD                                           | irCOR                                           | ukWAR                                           | beSCH                                           | frFRE                                           | frLOI                                           | frBAG                                           | TOTAL                                           |
|                            |                            | <i>n</i> = 9                                     | <i>n</i> = 10                                   | <i>n</i> = 10                                   | <i>n</i> = 9                                    | <i>n</i> = 9                                    | <i>n</i> = 10                                   | <i>n</i> = 9                                    | <i>n</i> = 9                                    | <i>n</i> = 75                                   |
| Muscula-<br>r POPs         | BTBPE                      | 1.0x10 <sup>-2</sup> (0.0)                       | 1.4x10 <sup>-2</sup><br>(9.0x10 <sup>-3</sup> ) | 1.1x10 <sup>-2</sup><br>(4.5x10 <sup>-3</sup> ) | 3.5x10 <sup>-2</sup><br>(5.5x10 <sup>-2</sup> ) | 2.4x10 <sup>-2</sup><br>(1.3x10 <sup>-2</sup> ) | 3.3x10 <sup>-2</sup><br>(3.1x10 <sup>-2</sup> ) | 1.6x10 <sup>-2</sup><br>(1.8x10 <sup>-2</sup> ) | 2.8x10 <sup>-2</sup><br>(3.1x10 <sup>-2</sup> ) | 2.1x10 <sup>-2</sup><br>(2.7x10 <sup>-2</sup> ) |
|                            |                            | 1.0x10 <sup>-2</sup> ;                           | 1.0x10 <sup>-2</sup> ;                          | 1.0x10 <sup>-2</sup> ;                          | 1.0x10 <sup>-2</sup> ;                          | 1.0x10 <sup>-2</sup> ;                          | 1.0x10 <sup>-2</sup> ;                          | 1.0x10 <sup>-2</sup> ;                          | 1.0x10 <sup>-2</sup> ;                          | 1.0x10 <sup>-2</sup> ;                          |
|                            |                            | 1.0x10 <sup>-2</sup>                             | 3.4x10 <sup>-2</sup>                            | 2.4x10 <sup>-2</sup>                            | 1.8x10 <sup>-1</sup>                            | 4.0x10 <sup>-2</sup>                            | 9.2x10 <sup>-2</sup>                            | 6.5x10 <sup>-2</sup>                            | 1.0x10 <sup>-1</sup>                            | 1.8x10 <sup>-1</sup>                            |
|                            | DDTs                       | 1.7x10 <sup>+1</sup><br>(1.2x10 <sup>+1</sup> )  | 1.1x10 <sup>+1</sup> (6.3)                      | 3.5 (2.5)                                       | 5.0x10 <sup>+1</sup><br>(1.9x10 <sup>+1</sup> ) | 1.1x10 <sup>+2</sup><br>(7.3x10 <sup>+1</sup> ) | 1.2x10 <sup>+1</sup> (8.0)                      | 1.7x10 <sup>+1</sup> (7.7)                      | 6.3x10 <sup>+1</sup><br>(2.5x10 <sup>+1</sup> ) | 3.4x10 <sup>+1</sup><br>(4.3x10 <sup>+1</sup> ) |
|                            |                            | 6.9 ; 4.7x10 <sup>+1</sup>                       | 2.5 ; 2.3x10 <sup>+1</sup>                      | 8.8x10 <sup>-1</sup> ; 8.4                      | 2.7x10 <sup>+1</sup> ;<br>9.2x10 <sup>+1</sup>  | 3.3x10 <sup>+1</sup> ;<br>2.2x10 <sup>+2</sup>  | 2.3 ; 2.3x10 <sup>+1</sup>                      | 5.6 ; 2.8x10 <sup>+1</sup>                      | 3.9x10 <sup>+1</sup> ;<br>1.0x10 <sup>+2</sup>  | 8.8x10 <sup>-1</sup> ;<br>2.2x10 <sup>+2</sup>  |
|                            |                            | 1.4 (9.2x10 <sup>-1</sup> )                      | 5.3x10 <sup>-1</sup><br>(3.4x10 <sup>-1</sup> ) | 2.5 (1.9)                                       | 3.3x10 <sup>+2</sup><br>(1.4x10 <sup>+2</sup> ) | 1.9x10 <sup>-1</sup><br>(1.8x10 <sup>-1</sup> ) | 1.3 (9.8x10 <sup>-1</sup> )                     | 3.5 (1.7)                                       | 1.7x10 <sup>-1</sup><br>(4.2x10 <sup>-2</sup> ) | 4.3x10 <sup>-1</sup><br>(1.2x10 <sup>+2</sup> ) |
|                            | HBCDs                      | 4.5x10 <sup>-1</sup> ; 3.6                       | 1.5x10 <sup>-1</sup> ; 1.3                      | 3.1x10 <sup>-1</sup> ; 5.7                      | 1.1x10 <sup>+2</sup> ;<br>6.3x10 <sup>+2</sup>  | 2.6x10 <sup>-1</sup> ;<br>4.6x10 <sup>+1</sup>  | 2.8x10 <sup>-1</sup> ; 3.3                      | 1.0 ; 6.3                                       | 1.5x10 <sup>-1</sup> ;<br>2.5x10 <sup>-1</sup>  | 1.5x10 <sup>-1</sup> ;<br>6.3x10 <sup>+2</sup>  |
|                            |                            | HCB                                              | 1.3 (5.3x10 <sup>-1</sup> )                     | 4.5x10 <sup>-1</sup><br>(3.5x10 <sup>-1</sup> ) | 5.6x10 <sup>-1</sup><br>(2.4x10 <sup>-1</sup> ) | 2.5 (9.1x10 <sup>-1</sup> )                     | 5.9 (1.2x10 <sup>+1</sup> )                     | 3.6x10 <sup>-1</sup><br>(1.8x10 <sup>-1</sup> ) | 9.5x10 <sup>-1</sup><br>(7.3x10 <sup>-1</sup> ) | 2.8x10 <sup>-1</sup><br>(3.5x10 <sup>-1</sup> ) |
|                            | 4.8x10 <sup>-1</sup> ; 2.2 |                                                  | 1.0x10 <sup>-1</sup> ; 1.2                      | 2.3x10 <sup>-1</sup> ;<br>9.4x10 <sup>-1</sup>  | 1.2 ; 4.2                                       | 2.5x10 <sup>-1</sup> ;<br>3.8x10 <sup>+1</sup>  | 1.0x10 <sup>-1</sup> ;<br>6.0x10 <sup>-1</sup>  | 2.3x10 <sup>-1</sup> ; 2.3                      | 1.0x10 <sup>-1</sup> ; 1.2                      | 1.0x10 <sup>-1</sup> ;<br>3.8x10 <sup>+1</sup>  |
|                            | PBDEs                      | 1.4 (6.5x10 <sup>-1</sup> )                      | 1.3 (1.2)                                       | 2.2 (1.6)                                       | 4.0x10 <sup>+1</sup><br>(1.9x10 <sup>+1</sup> ) | 6.6 (5.5)                                       | 1.9 (1.6)                                       | 7.5 (4.8)                                       | 3.8x10 <sup>-1</sup><br>(1.7x10 <sup>-1</sup> ) | 7.4 (1.4x10 <sup>+1</sup> )                     |
|                            |                            | 7.2x10 <sup>-1</sup> ; 2.6                       | 2.9x10 <sup>-1</sup> ; 3.4                      | 5.4x10 <sup>-1</sup> ; 5.2                      | 1.3x10 <sup>+1</sup> ;<br>7.5x10 <sup>+1</sup>  | 6.9x10 <sup>-1</sup> ;<br>1.4x10 <sup>-1</sup>  | 2.6x10 <sup>-1</sup> ; 4.9                      | 2.1 ; 1.5x10 <sup>+1</sup>                      | 1.7x10 <sup>-1</sup> ;<br>7.4x10 <sup>-1</sup>  | 1.7x10 <sup>-1</sup> ;<br>7.5x10 <sup>+1</sup>  |
|                            | PCBs                       | 6.7x10 <sup>+11</sup><br>(4.7x10 <sup>+1</sup> ) | 2.3x10 <sup>+1</sup><br>(1.1x10 <sup>+1</sup> ) | 8.6 (3.1)                                       | 3.1x10 <sup>+2</sup><br>(1.6x10 <sup>+2</sup> ) | 2.1x10 <sup>+3</sup><br>(2.7x10 <sup>+3</sup> ) | 5.1x10 <sup>+1</sup><br>(3.3x10 <sup>+1</sup> ) | 2.8x10 <sup>+2</sup><br>(1.2x10 <sup>+2</sup> ) | 3.4x10 <sup>+1</sup><br>(1.6x10 <sup>+1</sup> ) | 3.5x10 <sup>+2</sup><br>(1.1x10 <sup>+3</sup> ) |

|                |    |                                                 |                                                 |                                                 |                                                 |                                                 |                                                 |                                                 |                                                 |                                                 |
|----------------|----|-------------------------------------------------|-------------------------------------------------|-------------------------------------------------|-------------------------------------------------|-------------------------------------------------|-------------------------------------------------|-------------------------------------------------|-------------------------------------------------|-------------------------------------------------|
|                |    | 2.7x10 <sup>+1</sup> ;<br>1.7x10 <sup>+2</sup>  | 4.3 ; 4.0x10 <sup>+1</sup>                      | 5.0 ; 1.4x10 <sup>+1</sup>                      | 1.1x10 <sup>+2</sup> ;<br>5.8x10 <sup>+2</sup>  | 4.6x10 <sup>+1</sup> ;<br>8.1x10 <sup>+3</sup>  | 8.0 ; 1.0x10 <sup>+2</sup>                      | 9.1x10 <sup>+1</sup> ;<br>4.9x10 <sup>+2</sup>  | 1.4x10 <sup>+1</sup> ;<br>5.5x10 <sup>+1</sup>  | 4.3 ; 8.1x10 <sup>+3</sup>                      |
| Gonadic<br>TEs | As | 4.4x10 <sup>-1</sup><br>(1.7x10 <sup>-1</sup> ) | 2.1x10 <sup>-1</sup><br>(1.1x10 <sup>-1</sup> ) | 2.0x10 <sup>-1</sup><br>(4.0x10 <sup>-2</sup> ) | 1.6x10 <sup>-1</sup><br>(9.2x10 <sup>-2</sup> ) | 1.6x10 <sup>-1</sup><br>(6.5x10 <sup>-2</sup> ) | 1.8x10 <sup>-1</sup><br>(6.2x10 <sup>-2</sup> ) | 1.4x10 <sup>-1</sup><br>(7.0x10 <sup>-2</sup> ) | 7.2x10 <sup>-1</sup><br>(2.3x10 <sup>-1</sup> ) | 2.7x10 <sup>-1</sup><br>(2.2x10 <sup>-1</sup> ) |
|                |    | 1.4x10 <sup>-1</sup> ;<br>6.6x10 <sup>-1</sup>  | 7.9x10 <sup>-2</sup> ;<br>4.1x10 <sup>-1</sup>  | 1.4x10 <sup>-1</sup> ;<br>2.6x10 <sup>-1</sup>  | 2.4x10 <sup>-2</sup> ;<br>3.2x10 <sup>-1</sup>  | 5.6x10 <sup>-2</sup> ;<br>2.6x10 <sup>-1</sup>  | 8.4x10 <sup>-2</sup> ;<br>2.6x10 <sup>-1</sup>  | 4.9x10 <sup>-2</sup> ;<br>2.8x10 <sup>-1</sup>  | 3.1x10 <sup>-1</sup> ; 1.1                      | 2.4x10 <sup>-2</sup> ; 1.1                      |
|                |    | 2.6x10 <sup>-2</sup><br>(8.7x10 <sup>-3</sup> ) | 3.2x10 <sup>-2</sup><br>(3.2x10 <sup>-2</sup> ) | 6.8x10 <sup>-2</sup><br>(3.6x10 <sup>-2</sup> ) | 9.8x10 <sup>-2</sup><br>(8.5x10 <sup>-2</sup> ) | 1.5x10 <sup>-1</sup><br>(1.4x10 <sup>-1</sup> ) | 2.0x10 <sup>-2</sup><br>(2.2x10 <sup>-2</sup> ) | 2.6x10 <sup>-2</sup><br>(1.4x10 <sup>-2</sup> ) | 1.5x10 <sup>-2</sup><br>(1.5x10 <sup>-2</sup> ) | 5.4x10 <sup>-2</sup><br>(7.1x10 <sup>-2</sup> ) |
|                |    | 1.4x10 <sup>-2</sup> ;<br>3.9x10 <sup>-2</sup>  | 8.3x10 <sup>-3</sup> ;<br>1.1x10 <sup>-1</sup>  | 3.2x10 <sup>-2</sup> ;<br>1.4x10 <sup>-1</sup>  | 1.6x10 <sup>-2</sup> ;<br>2.9x10 <sup>-1</sup>  | 1.2x10 <sup>-2</sup> ;<br>3.2x10 <sup>-1</sup>  | 6.6x10 <sup>-3</sup> ;<br>8.1x10 <sup>-2</sup>  | 2.2x10 <sup>-3</sup> ;<br>5.1x10 <sup>-2</sup>  | 4.2x10 <sup>-3</sup> ;<br>5.0x10 <sup>-2</sup>  | 2.2x10 <sup>-3</sup> ;<br>3.2x10 <sup>-1</sup>  |
|                | Cd | 5.1x10 <sup>-2</sup><br>(2.3x10 <sup>-2</sup> ) | 6.8x10 <sup>-2</sup><br>(2.9x10 <sup>-2</sup> ) | 5.6x10 <sup>-2</sup><br>(1.7x10 <sup>-2</sup> ) | 1.8x10 <sup>-1</sup><br>(1.6x10 <sup>-1</sup> ) | 1.1x10 <sup>-1</sup><br>(5.1x10 <sup>-2</sup> ) | 1.3x10 <sup>-1</sup><br>(5.7x10 <sup>-2</sup> ) | 1.3x10 <sup>-1</sup><br>(2.6x10 <sup>-2</sup> ) | 9.1x10 <sup>-2</sup><br>(6.3x10 <sup>-2</sup> ) | 1.0x10 <sup>-1</sup><br>(7.7x10 <sup>-2</sup> ) |
|                |    | 2.2x10 <sup>-2</sup> ;<br>1.0x10 <sup>-1</sup>  | 2.6x10 <sup>-2</sup> ;<br>1.2x10 <sup>-1</sup>  | 3.3x10 <sup>-2</sup> ;<br>8.0x10 <sup>-2</sup>  | 7.3x10 <sup>-2</sup> ;<br>5.8x10 <sup>-1</sup>  | 3.8x10 <sup>-2</sup> ;<br>1.9x10 <sup>-1</sup>  | 7.6x10 <sup>-2</sup> ;<br>2.2x10 <sup>-1</sup>  | 9.5x10 <sup>-2</sup> ;<br>1.7x10 <sup>-1</sup>  | 2.9x10 <sup>-2</sup> ;<br>2.1x10 <sup>-1</sup>  | 2.2x10 <sup>-2</sup> ;<br>5.8x10 <sup>-1</sup>  |
|                |    | 4.0x10 <sup>-2</sup><br>(3.0x10 <sup>-2</sup> ) | 1.4x10 <sup>-1</sup><br>(1.3x10 <sup>-1</sup> ) | 8.8x10 <sup>-2</sup><br>(2.8x10 <sup>-2</sup> ) | 7.4x10 <sup>-2</sup><br>(2.1x10 <sup>-2</sup> ) | 5.6x10 <sup>-2</sup><br>(2.0x10 <sup>-2</sup> ) | 7.1x10 <sup>-2</sup><br>(3.2x10 <sup>-2</sup> ) | 6.9x10 <sup>-2</sup><br>(3.4x10 <sup>-2</sup> ) | 1.7x10 <sup>-1</sup><br>(2.7x10 <sup>-1</sup> ) | 9.0x10 <sup>-2</sup><br>(1.1x10 <sup>-1</sup> ) |
|                | Cr | 2.4x10 <sup>-2</sup> ;<br>1.1x10 <sup>-1</sup>  | 5.3x10 <sup>-2</sup> ;<br>4.8x10 <sup>-1</sup>  | 6.1x10 <sup>-2</sup> ;<br>1.6x10 <sup>-1</sup>  | 5.2x10 <sup>-2</sup> ;<br>1.1x10 <sup>-1</sup>  | 2.4x10 <sup>-2</sup> ;<br>8.1x10 <sup>-2</sup>  | 2.4x10 <sup>-2</sup> ;<br>1.2x10 <sup>-1</sup>  | 2.4x10 <sup>-2</sup> ;<br>1.2x10 <sup>-1</sup>  | 2.4x10 <sup>-2</sup> ;<br>8.9x10 <sup>-1</sup>  | 2.4x10 <sup>-2</sup> ;<br>8.9x10 <sup>-1</sup>  |
|                |    | 9.9x10 <sup>-1</sup><br>(4.2x10 <sup>-1</sup> ) | 1.9 (8.0x10 <sup>-1</sup> )                     | 1.2 (4.2x10 <sup>-1</sup> )                     | 7.8x10 <sup>-1</sup><br>(7.7x10 <sup>-2</sup> ) | 8.3x10 <sup>-1</sup><br>(1.5x10 <sup>-1</sup> ) | 7.9x10 <sup>-1</sup><br>(1.2x10 <sup>-1</sup> ) | 8.0x10 <sup>-1</sup><br>(1.6x10 <sup>-1</sup> ) | 6.2x10 <sup>-1</sup><br>(1.3x10 <sup>-1</sup> ) | 1.0 (5.4x10 <sup>-1</sup> )                     |
|                |    | 4.6x10 <sup>-1</sup> ; 1.7                      | 8.5x10 <sup>-1</sup> ; 3.3                      | 5.5x10 <sup>-1</sup> ; 2.0                      | 6.9x10 <sup>-1</sup> ;<br>9.4x10 <sup>-1</sup>  | 5.2x10 <sup>-1</sup> ; 1.1                      | 5.6x10 <sup>-1</sup> ;<br>9.4x10 <sup>-1</sup>  | 5.6x10 <sup>-1</sup> ; 1.0                      | 4.3x10 <sup>-1</sup> ;<br>8.5x10 <sup>-1</sup>  | 4.3x10 <sup>-1</sup> ; 3.3                      |
|                | Fe | 1.5x10 <sup>+1</sup> (4.2)                      | 3.7x10 <sup>+1</sup> (8.9)                      | 1.2x10 <sup>+1</sup> (2.8)                      | 1.7x10 <sup>+1</sup> (7.6)                      | 2.5x10 <sup>+1</sup> (8.2)                      | 1.4x10 <sup>+1</sup> (4.2)                      | 2.1x10 <sup>+1</sup> (7.2)                      | 1.0x10 <sup>+1</sup> (3.5)                      | 1.9x10 <sup>+1</sup><br>(1.0x10 <sup>+1</sup> ) |
|                |    | 9.8 ; 2.4x10 <sup>+1</sup>                      | 2.4x10 <sup>+1</sup> ;<br>5.0x10 <sup>+1</sup>  | 8.3 ; 1.6x10 <sup>+1</sup>                      | 7.8 ; 3.0x10 <sup>+1</sup>                      | 7.2 ; 3.5x10 <sup>+1</sup>                      | 9.4 ; 2.1x10 <sup>+1</sup>                      | 1.0x10 <sup>+1</sup> ;<br>3.2x10 <sup>+1</sup>  | 6.5 ; 1.7x10 <sup>+1</sup>                      | 6.5 ; 5.0x10 <sup>+1</sup>                      |
|                |    | 1.3x10 <sup>-2</sup><br>(5.1x10 <sup>-3</sup> ) | 1.8x10 <sup>-2</sup><br>(1.4x10 <sup>-2</sup> ) | 3.9x10 <sup>-2</sup><br>(1.8x10 <sup>-2</sup> ) | 2.7x10 <sup>-2</sup><br>(1.1x10 <sup>-2</sup> ) | 3.4x10 <sup>-2</sup><br>(5.1x10 <sup>-2</sup> ) | 3.4x10 <sup>-2</sup><br>(1.5x10 <sup>-2</sup> ) | 1.8x10 <sup>-2</sup><br>(6.1x10 <sup>-3</sup> ) | 2.3x10 <sup>-2</sup><br>(1.7x10 <sup>-2</sup> ) | 2.6x10 <sup>-2</sup><br>(2.2x10 <sup>-2</sup> ) |
|                | Hg | 3.4x10 <sup>-3</sup> ;<br>1.9x10 <sup>-2</sup>  | 5.6x10 <sup>-3</sup> ;<br>4.7x10 <sup>-2</sup>  | 1.4x10 <sup>-2</sup> ;<br>6.9x10 <sup>-2</sup>  | 9.6x10 <sup>-3</sup> ;<br>4.4x10 <sup>-2</sup>  | 2.2x10 <sup>-3</sup> ;<br>1.6x10 <sup>-1</sup>  | 1.5x10 <sup>-2</sup> ;<br>6.7x10 <sup>-2</sup>  | 9.4x10 <sup>-3</sup> ;<br>2.6x10 <sup>-2</sup>  | 3.6x10 <sup>-3</sup> ;<br>4.6x10 <sup>-2</sup>  | 2.2x10 <sup>-3</sup> ;<br>1.6x10 <sup>-1</sup>  |
|                |    | 2.2x10 <sup>-1</sup><br>(5.2x10 <sup>-2</sup> ) | 4.9x10 <sup>-1</sup><br>(1.8x10 <sup>-1</sup> ) | 2.8x10 <sup>-1</sup><br>(8.2x10 <sup>-2</sup> ) | 3.1x10 <sup>-1</sup><br>(7.7x10 <sup>-2</sup> ) | 2.7x10 <sup>-1</sup><br>(6.0x10 <sup>-2</sup> ) | 3.7x10 <sup>-1</sup><br>(6.7x10 <sup>-2</sup> ) | 3.2x10 <sup>-1</sup><br>(1.1x10 <sup>-1</sup> ) | 2.8x10 <sup>-1</sup><br>(1.8x10 <sup>-1</sup> ) | 3.2x10 <sup>-1</sup><br>(1.3x10 <sup>-1</sup> ) |
|                |    | 1.4x10 <sup>-1</sup> ;<br>3.1x10 <sup>-1</sup>  | 2.5x10 <sup>-1</sup> ;<br>7.9x10 <sup>-1</sup>  | 1.5x10 <sup>-1</sup> ;<br>4.0x10 <sup>-1</sup>  | 2.6x10 <sup>-1</sup> ;<br>5.0x10 <sup>-1</sup>  | 1.4x10 <sup>-1</sup> ;<br>3.3x10 <sup>-1</sup>  | 2.9x10 <sup>-1</sup> ;<br>4.7x10 <sup>-1</sup>  | 1.9x10 <sup>-1</sup> ;<br>5.3x10 <sup>-1</sup>  | 1.2x10 <sup>-1</sup> ;<br>7.2x10 <sup>-1</sup>  | 1.2x10 <sup>-1</sup> ;<br>7.9x10 <sup>-1</sup>  |
|                | Ni | 3.9x10 <sup>-2</sup><br>(4.7x10 <sup>-2</sup> ) | 2.0x10 <sup>-1</sup><br>(2.4x10 <sup>-1</sup> ) | 3.9x10 <sup>-2</sup><br>(2.2x10 <sup>-2</sup> ) | 1.4x10 <sup>-1</sup><br>(1.7x10 <sup>-1</sup> ) | 1.4x10 <sup>-1</sup><br>(2.7x10 <sup>-1</sup> ) | 1.5x10 <sup>-1</sup><br>(1.9x10 <sup>-1</sup> ) | 7.5x10 <sup>-2</sup><br>(8.1x10 <sup>-2</sup> ) | 8.3x10 <sup>-2</sup><br>(1.1x10 <sup>-1</sup> ) | 1.1x10 <sup>-1</sup><br>(1.6x10 <sup>-1</sup> ) |
|                |    | 7.9x10 <sup>-3</sup> ;<br>1.6x10 <sup>-1</sup>  | 2.1x10 <sup>-2</sup> ;<br>7.1x10 <sup>-1</sup>  | 1.5x10 <sup>-2</sup> ;<br>8.6x10 <sup>-2</sup>  | 2.3x10 <sup>-2</sup> ;<br>5.3x10 <sup>-1</sup>  | 1.2x10 <sup>-2</sup> ;<br>8.5x10 <sup>-1</sup>  | 1.8x10 <sup>-2</sup> ;<br>6.5x10 <sup>-1</sup>  | 1.3x10 <sup>-2</sup> ;<br>2.2x10 <sup>-1</sup>  | 5.5x10 <sup>-3</sup> ;<br>2.8x10 <sup>-1</sup>  | 5.5x10 <sup>-3</sup> ;<br>8.5x10 <sup>-1</sup>  |
|                |    | 2.9x10 <sup>-3</sup><br>(1.5x10 <sup>-3</sup> ) | 9.6x10 <sup>-3</sup><br>(1.7x10 <sup>-2</sup> ) | 4.5x10 <sup>-3</sup><br>(4.0x10 <sup>-3</sup> ) | 1.5x10 <sup>-2</sup><br>(1.2x10 <sup>-2</sup> ) | 2.1x10 <sup>-2</sup><br>(1.2x10 <sup>-2</sup> ) | 3.3x10 <sup>-2</sup><br>(5.0x10 <sup>-2</sup> ) | 9.5x10 <sup>-3</sup><br>(1.8x10 <sup>-2</sup> ) | 4.0x10 <sup>-3</sup><br>(3.5x10 <sup>-3</sup> ) | 1.3x10 <sup>-2</sup><br>(2.3x10 <sup>-2</sup> ) |
|                | Pb | 2.2x10 <sup>-3</sup> ;<br>5.6x10 <sup>-3</sup>  | 2.2x10 <sup>-3</sup> ;<br>5.6x10 <sup>-2</sup>  | 2.2x10 <sup>-3</sup> ;<br>1.4x10 <sup>-2</sup>  | 4.8x10 <sup>-3</sup> ;<br>4.0x10 <sup>-2</sup>  | 6.4x10 <sup>-3</sup> ;<br>4.1x10 <sup>-2</sup>  | 2.2x10 <sup>-3</sup> ;<br>1.7x10 <sup>-1</sup>  | 2.2x10 <sup>-3</sup> ;<br>5.8x10 <sup>-2</sup>  | 2.2x10 <sup>-3</sup> ;<br>1.2x10 <sup>-2</sup>  | 2.2x10 <sup>-3</sup> ;<br>1.7x10 <sup>-1</sup>  |
|                |    | 5.5x10 <sup>-1</sup><br>(1.8x10 <sup>-1</sup> ) | 8.5x10 <sup>-1</sup><br>(3.3x10 <sup>-1</sup> ) | 1.1 (1.9x10 <sup>-1</sup> )                     | 9.0x10 <sup>-1</sup><br>(3.0x10 <sup>-1</sup> ) | 6.8x10 <sup>-1</sup><br>(3.3x10 <sup>-1</sup> ) | 6.6x10 <sup>-1</sup><br>(1.7x10 <sup>-1</sup> ) | 1.0 (8.4x10 <sup>-1</sup> )                     | 1.2 (5.8x10 <sup>-1</sup> )                     | 8.6x10 <sup>-1</sup><br>(4.5x10 <sup>-1</sup> ) |
|                |    | 3.2x10 <sup>-1</sup> ;<br>7.9x10 <sup>-1</sup>  | 3.3x10 <sup>-1</sup> ; 1.3                      | 8.3x10 <sup>-1</sup> ; 1.4                      | 4.3x10 <sup>-1</sup> ; 1.5                      | 2.1x10 <sup>-1</sup> ; 1.2                      | 4.5x10 <sup>-1</sup> ; 1.0                      | 3.3x10 <sup>-1</sup> ; 3.1                      | 4.0x10 <sup>-1</sup> ; 1.9                      | 2.1x10 <sup>-1</sup> ; 3.1                      |
|                | Zn | 4.9x10 <sup>+1</sup><br>(1.0x10 <sup>+1</sup> ) | 7.0x10 <sup>+1</sup><br>(1.1x10 <sup>+1</sup> ) | 7.0x10 <sup>+1</sup><br>(1.3x10 <sup>+1</sup> ) | 7.9x10 <sup>+1</sup><br>(1.1x10 <sup>+1</sup> ) | 1.0x10 <sup>+2</sup><br>(3.2x10 <sup>+1</sup> ) | 9.2x10 <sup>+1</sup><br>(1.1x10 <sup>+1</sup> ) | 8.1x10 <sup>+1</sup><br>(1.1x10 <sup>+1</sup> ) | 7.2x10 <sup>+1</sup><br>(2.0x10 <sup>+1</sup> ) | 7.7x10 <sup>+1</sup><br>(2.2x10 <sup>+1</sup> ) |
|                |    | 3.3x10 <sup>+1</sup> ;<br>6.2x10 <sup>+1</sup>  | 4.8x10 <sup>+1</sup> ;<br>8.4x10 <sup>+1</sup>  | 5.0x10 <sup>+1</sup> ;<br>9.3x10 <sup>+1</sup>  | 6.2x10 <sup>+1</sup> ;<br>9.7x10 <sup>+1</sup>  | 5.1x10 <sup>+1</sup> ;<br>1.6x10 <sup>+2</sup>  | 7.5x10 <sup>+1</sup> ;<br>1.1x10 <sup>+2</sup>  | 6.5x10 <sup>+1</sup> ;<br>9.3x10 <sup>+1</sup>  | 4.8x10 <sup>+1</sup> ;<br>1.1x10 <sup>+2</sup>  | 3.3x10 <sup>+1</sup> ;<br>1.6x10 <sup>+2</sup>  |
|                |    | 1.2x10 <sup>-1</sup><br>(9.6x10 <sup>-2</sup> ) | 8.5x10 <sup>-2</sup><br>(1.2x10 <sup>-1</sup> ) | 1.3x10 <sup>-1</sup><br>(9.2x10 <sup>-2</sup> ) | 1.8x10 <sup>-1</sup><br>(1.9x10 <sup>-1</sup> ) | 4.5x10 <sup>-2</sup><br>(3.3x10 <sup>-2</sup> ) | 1.9x10 <sup>-1</sup><br>(4.5x10 <sup>-1</sup> ) | 4.2x10 <sup>-2</sup><br>(2.5x10 <sup>-2</sup> ) | 4.4x10 <sup>-1</sup><br>(3.4x10 <sup>-1</sup> ) | 1.5x10 <sup>-1</sup><br>(2.4x10 <sup>-1</sup> ) |
| Hepatic<br>TEs | As | 2.3x10 <sup>-2</sup> ;<br>2.7x10 <sup>-1</sup>  | 2.3x10 <sup>-2</sup> ;<br>3.9x10 <sup>-1</sup>  | 2.1x10 <sup>-2</sup> ;<br>2.9x10 <sup>-1</sup>  | 2.3x10 <sup>-2</sup> ;<br>5.4x10 <sup>-1</sup>  | 2.3x10 <sup>-2</sup> ;<br>1.0x10 <sup>-1</sup>  | 2.3x10 <sup>-2</sup> ; 1.5                      | 2.1x10 <sup>-3</sup> ;<br>7.5x10 <sup>-2</sup>  | 2.3x10 <sup>-2</sup> ; 1.0                      | 2.1x10 <sup>-3</sup> ; 1.5                      |
|                |    | 2.8x10 <sup>-1</sup><br>(3.9x10 <sup>-1</sup> ) | 1.6x10 <sup>-1</sup><br>(1.6x10 <sup>-1</sup> ) | 6.2x10 <sup>-1</sup><br>(7.1x10 <sup>-1</sup> ) | 2.5 (9.6x10 <sup>-1</sup> )                     | 2.3 (2.1)                                       | 9.1x10 <sup>-1</sup><br>(9.4x10 <sup>-1</sup> ) | 6.0x10 <sup>-1</sup><br>(4.0x10 <sup>-1</sup> ) | 7.3x10 <sup>-1</sup><br>(8.0x10 <sup>-1</sup> ) | 1.0 (1.2)                                       |
|                |    | 6.5x10 <sup>-2</sup> ; 1.3                      | 3.6x10 <sup>-2</sup> ;<br>5.0x10 <sup>-1</sup>  | 7.3x10 <sup>-2</sup> ; 2.5                      | 1.4 ; 4.0                                       | 9.1x10 <sup>-2</sup> ; 5.3                      | 2.6x10 <sup>-1</sup> ; 3.4                      | 1.4x10 <sup>-1</sup> ; 1.3                      | 2.0x10 <sup>-1</sup> ; 2.3                      | 3.6x10 <sup>-2</sup> ; 5.3                      |
|                | Cd | 5.8x10 <sup>-2</sup><br>(3.7x10 <sup>-2</sup> ) | 6.0x10 <sup>-2</sup><br>(3.7x10 <sup>-2</sup> ) | 5.0x10 <sup>-2</sup><br>(2.7x10 <sup>-2</sup> ) | 2.6x10 <sup>-1</sup><br>(2.5x10 <sup>-1</sup> ) | 8.4x10 <sup>-2</sup><br>(5.1x10 <sup>-2</sup> ) | 1.9x10 <sup>-1</sup><br>(1.2x10 <sup>-1</sup> ) | 1.8x10 <sup>-1</sup><br>(9.7x10 <sup>-2</sup> ) | 1.5x10 <sup>-1</sup><br>(1.2x10 <sup>-1</sup> ) | 1.3x10 <sup>-1</sup><br>(1.3x10 <sup>-1</sup> ) |
|                |    | 2.2x10 <sup>-2</sup> ;<br>1.1x10 <sup>-1</sup>  | 2.7x10 <sup>-2</sup> ;<br>1.2x10 <sup>-1</sup>  | 2.1x10 <sup>-2</sup> ;<br>1.2x10 <sup>-1</sup>  | 7.8x10 <sup>-2</sup> ;<br>9.0x10 <sup>-1</sup>  | 2.1x10 <sup>-2</sup> ;<br>1.8x10 <sup>-1</sup>  | 1.0x10 <sup>-1</sup> ;<br>4.2x10 <sup>-1</sup>  | 6.8x10 <sup>-2</sup> ;<br>3.9x10 <sup>-1</sup>  | 3.1x10 <sup>-2</sup> ;<br>3.5x10 <sup>-1</sup>  | 2.1x10 <sup>-2</sup> ;<br>9.0x10 <sup>-1</sup>  |
|                |    | 2.8x10 <sup>-1</sup><br>(3.9x10 <sup>-1</sup> ) | 1.6x10 <sup>-1</sup><br>(1.6x10 <sup>-1</sup> ) | 6.2x10 <sup>-1</sup><br>(7.1x10 <sup>-1</sup> ) | 2.5 (9.6x10 <sup>-1</sup> )                     | 2.3 (2.1)                                       | 9.1x10 <sup>-1</sup><br>(9.4x10 <sup>-1</sup> ) | 6.0x10 <sup>-1</sup><br>(4.0x10 <sup>-1</sup> ) | 7.3x10 <sup>-1</sup><br>(8.0x10 <sup>-1</sup> ) | 1.0 (1.2)                                       |

|              |                            |                             |                             |                             |                             |                             |                             |                             |                            |                            |
|--------------|----------------------------|-----------------------------|-----------------------------|-----------------------------|-----------------------------|-----------------------------|-----------------------------|-----------------------------|----------------------------|----------------------------|
| Muscular TEs | Cr                         | 3.6x10 <sup>-2</sup>        | 4.6x10 <sup>-2</sup>        | 5.4x10 <sup>-2</sup>        | 6.5x10 <sup>-2</sup>        | 6.1x10 <sup>-2</sup>        | 4.0x10 <sup>-2</sup>        | 5.4x10 <sup>-2</sup>        | 5.8x10 <sup>-2</sup>       | 5.2x10 <sup>-2</sup>       |
|              |                            | (1.5x10 <sup>-2</sup> )     | (1.6x10 <sup>-2</sup> )     | (1.8x10 <sup>-2</sup> )     | (2.7x10 <sup>-2</sup> )     | (4.5x10 <sup>-2</sup> )     | (1.8x10 <sup>-2</sup> )     | (1.4x10 <sup>-2</sup> )     | (2.3x10 <sup>-2</sup> )    | (2.5x10 <sup>-2</sup> )    |
|              |                            | 2.3x10 <sup>-2</sup> ;      | 2.3x10 <sup>-2</sup> ;     | 2.3x10 <sup>-2</sup> ;     |
|              |                            | 5.5x10 <sup>-2</sup>        | 6.4x10 <sup>-2</sup>        | 7.5x10 <sup>-2</sup>        | 1.2x10 <sup>-1</sup>        | 1.7x10 <sup>-1</sup>        | 6.5x10 <sup>-2</sup>        | 7.2x10 <sup>-2</sup>        | 8.5x10 <sup>-2</sup>       | 1.7x10 <sup>-1</sup>       |
|              | Cu                         | 2.3x10 <sup>+1</sup> (8.8)  | 3.5x10 <sup>+1</sup>        | 3.9x10 <sup>+1</sup>        | 5.2x10 <sup>+1</sup>        | 3.8x10 <sup>+1</sup>        | 4.1x10 <sup>+1</sup>        | 5.0x10 <sup>+1</sup>        | 4.5x10 <sup>+1</sup>       | 4.0x10 <sup>+1</sup>       |
|              |                            |                             | (1.9x10 <sup>+1</sup> )     | (2.1x10 <sup>+1</sup> )     | (3.1x10 <sup>+1</sup> )     | (2.4x10 <sup>+1</sup> )     | (2.0x10 <sup>+1</sup> )     | (1.6x10 <sup>+1</sup> )     | (1.9x10 <sup>+1</sup> )    | (2.1x10 <sup>+1</sup> )    |
|              |                            | 1.3x10 <sup>+1</sup> ;      | 1.1x10 <sup>+1</sup> ;      | 2.9 ; 7.5x10 <sup>+1</sup>  | 2.9x10 <sup>+1</sup> ;      | 6.2 ; 7.6x10 <sup>+1</sup>  | 7.2 ; 6.3x10 <sup>+1</sup>  | 2.4x10 <sup>+1</sup> ;      | 1.8x10 <sup>+1</sup> ;     | 2.9 ; 1.3x10 <sup>+2</sup> |
|              |                            | 3.9x10 <sup>+1</sup>        | 6.7x10 <sup>+1</sup>        |                             | 1.3x10 <sup>+2</sup>        |                             |                             | 6.8x10 <sup>+1</sup>        | 7.1x10 <sup>+1</sup>       |                            |
|              | Fe                         | 2.2x10 <sup>+2</sup>        | 5.1x10 <sup>+2</sup>        | 3.2x10 <sup>+2</sup>        | 4.2x10 <sup>+2</sup>        | 7.1x10 <sup>+2</sup>        | 8.5x10 <sup>+2</sup>        | 6.3x10 <sup>+2</sup>        | 6.6x10 <sup>+2</sup>       | 5.4x10 <sup>+2</sup>       |
|              |                            | (9.1x10 <sup>+1</sup> )     | (2.4x10 <sup>+2</sup> )     | (2.0x10 <sup>+2</sup> )     | (1.9x10 <sup>+2</sup> )     | (4.0x10 <sup>+2</sup> )     | (6.1x10 <sup>+2</sup> )     | (3.1x10 <sup>+2</sup> )     | (4.2x10 <sup>+2</sup> )    | (3.9x10 <sup>+2</sup> )    |
|              |                            | 9.8x10 <sup>+1</sup> ;      | 1.5x10 <sup>+2</sup> ;      | 8.6x10 <sup>+1</sup> ;      | 1.6x10 <sup>+2</sup> ;      | 1.6x10 <sup>+2</sup> ;      | 3.0x10 <sup>+2</sup> ;      | 2.5x10 <sup>+2</sup> ;      | 6.2x10 <sup>+1</sup> ;     | 6.2x10 <sup>+1</sup> ;     |
|              |                            | 3.6x10 <sup>+2</sup>        | 9.3x10 <sup>+2</sup>        | 6.9x10 <sup>+2</sup>        | 7.6x10 <sup>+2</sup>        | 1.4x10 <sup>+3</sup>        | 1.9x10 <sup>+3</sup>        | 1.2x10 <sup>+3</sup>        | 1.5x10 <sup>+3</sup>       | 1.9x10 <sup>+3</sup>       |
|              | Hg                         | 8.1x10 <sup>-2</sup>        | 7.7x10 <sup>-2</sup>        | 2.1x10 <sup>-1</sup>        | 1.5x10 <sup>-1</sup>        | 2.3x10 <sup>-1</sup>        | 2.0x10 <sup>-1</sup>        | 1.5x10 <sup>-1</sup>        | 2.7x10 <sup>-1</sup>       | 1.7x10 <sup>-1</sup>       |
|              |                            | (3.8x10 <sup>-2</sup> )     | (5.4x10 <sup>-2</sup> )     | (1.3x10 <sup>-1</sup> )     | (7.3x10 <sup>-2</sup> )     | (2.7x10 <sup>-1</sup> )     | (8.4x10 <sup>-2</sup> )     | (5.8x10 <sup>-2</sup> )     | (2.0x10 <sup>-1</sup> )    | (1.4x10 <sup>-1</sup> )    |
|              |                            | 2.0x10 <sup>-2</sup> ;      | 2.0x10 <sup>-2</sup> ;      | 5.0x10 <sup>-2</sup> ;      | 6.8x10 <sup>-2</sup> ;      | 1.0x10 <sup>-2</sup> ;      | 7.0x10 <sup>-2</sup> ;      | 7.0x10 <sup>-2</sup> ;      | 2.5x10 <sup>-2</sup> ;     | 1.0x10 <sup>-2</sup> ;     |
|              |                            | 1.3x10 <sup>-1</sup>        | 1.9x10 <sup>-1</sup>        | 4.4x10 <sup>-1</sup>        | 3.1x10 <sup>-1</sup>        | 8.3x10 <sup>-1</sup>        | 3.3x10 <sup>-1</sup>        | 2.4x10 <sup>-1</sup>        | 5.1x10 <sup>-1</sup>       | 8.3x10 <sup>-1</sup>       |
|              | Mn                         | 2.5 (9.6x10 <sup>-1</sup> ) | 3.8 (6.7x10 <sup>-1</sup> ) | 3.4 (7.1x10 <sup>-1</sup> ) | 3.5 (8.5x10 <sup>-1</sup> ) | 3.3 (1.3)                   | 4.5 (6.6x10 <sup>-1</sup> ) | 3.6 (6.3x10 <sup>-1</sup> ) | 5.5 (1.2)                  | 3.8 (1.2)                  |
|              |                            | 1.5 ; 4.5                   | 2.4 ; 4.7                   | 2.6 ; 4.7                   | 1.6 ; 4.5                   | 1.2 ; 4.9                   | 3.4 ; 5.4                   | 2.8 ; 4.6                   | 4.3 ; 7.6                  | 1.2 ; 7.6                  |
|              | Ni                         | 4.1x10 <sup>-2</sup>        | 3.3x10 <sup>-2</sup>        | 3.3x10 <sup>-2</sup>        | 1.9x10 <sup>-1</sup>        | 3.8x10 <sup>-2</sup>        | 5.6x10 <sup>-2</sup>        | 3.2x10 <sup>-2</sup>        | 5.8x10 <sup>-2</sup>       | 5.9x10 <sup>-2</sup>       |
|              |                            | (4.4x10 <sup>-2</sup> )     | (3.0x10 <sup>-2</sup> )     | (2.0x10 <sup>-2</sup> )     | (3.3x10 <sup>-1</sup> )     | (2.0x10 <sup>-2</sup> )     | (2.7x10 <sup>-2</sup> )     | (1.1x10 <sup>-2</sup> )     | (4.8x10 <sup>-2</sup> )    | (1.2x10 <sup>-1</sup> )    |
|              |                            | 1.2x10 <sup>-2</sup> ;      | 6.9x10 <sup>-3</sup> ;      | 8.8x10 <sup>-3</sup> ;      | 3.2x10 <sup>-2</sup> ; 1.0  | 1.4x10 <sup>-2</sup> ;      | 2.4x10 <sup>-2</sup> ;      | 1.8x10 <sup>-2</sup> ;      | 8.6x10 <sup>-3</sup> ;     | 6.9x10 <sup>-3</sup> ; 1.0 |
|              |                            | 1.5x10 <sup>-1</sup>        | 1.1x10 <sup>-1</sup>        | 7.8x10 <sup>-2</sup>        |                             | 7.6x10 <sup>-2</sup>        | 1.0x10 <sup>-1</sup>        | 5.4x10 <sup>-2</sup>        | 1.5x10 <sup>-1</sup>       |                            |
|              | Pb                         | 3.9x10 <sup>-2</sup>        | 3.2x10 <sup>-2</sup>        | 5.1x10 <sup>-2</sup>        | 3.9x10 <sup>-1</sup>        | 6.9x10 <sup>-1</sup>        | 3.2x10 <sup>-1</sup>        | 1.3x10 <sup>-1</sup>        | 9.2x10 <sup>-2</sup>       | 2.2x10 <sup>-1</sup>       |
|              |                            | (4.3x10 <sup>-2</sup> )     | (1.4x10 <sup>-2</sup> )     | (3.9x10 <sup>-2</sup> )     | (2.8x10 <sup>-1</sup> )     | (3.5x10 <sup>-1</sup> )     | (2.0x10 <sup>-1</sup> )     | (8.5x10 <sup>-2</sup> )     | (5.7x10 <sup>-2</sup> )    | (2.8x10 <sup>-1</sup> )    |
|              |                            | 9.6x10 <sup>-3</sup> ;      | 1.4x10 <sup>-2</sup> ;      | 7.0x10 <sup>-3</sup> ;      | 1.4x10 <sup>-1</sup> ;      | 2.1x10 <sup>-1</sup> ; 1.2  | 7.9x10 <sup>-2</sup> ;      | 5.6x10 <sup>-2</sup> ;      | 1.2x10 <sup>-2</sup> ;     | 7.0x10 <sup>-3</sup> ; 1.2 |
|              |                            | 1.5x10 <sup>-1</sup>        | 6.1x10 <sup>-2</sup>        | 1.5x10 <sup>-1</sup>        | 9.5x10 <sup>-1</sup>        |                             | 6.7x10 <sup>-1</sup>        | 3.5x10 <sup>-1</sup>        | 1.9x10 <sup>-1</sup>       |                            |
|              | Se                         | 6.2 (1.9)                   | 8.0 (2.6)                   | 1.3x10 <sup>+1</sup> (2.6)  | 1.6x10 <sup>+1</sup> (4.4)  | 1.3x10 <sup>+1</sup> (7.2)  | 1.1x10 <sup>+1</sup> (4.9)  | 1.7x10 <sup>+1</sup> (7.4)  | 1.5x10 <sup>+1</sup> (3.1) | 1.2x10 <sup>+1</sup> (5.7) |
|              |                            | 3.5 ; 9.2                   | 3.3 ; 1.3x10 <sup>+1</sup>  | 7.8 ; 1.6x10 <sup>+1</sup>  | 7.2 ; 2.3x10 <sup>+1</sup>  | 2.5 ; 2.6x10 <sup>+1</sup>  | 4.8 ; 1.9x10 <sup>+1</sup>  | 1.0x10 <sup>+1</sup> ;      | 1.1x10 <sup>+1</sup> ;     | 2.5 ; 3.4x10 <sup>+1</sup> |
|              |                            |                             |                             |                             |                             |                             | 3.4x10 <sup>+1</sup>        | 2.0x10 <sup>+1</sup>        |                            |                            |
| Zn           | 9.1x10 <sup>+1</sup>       | 1.1x10 <sup>+2</sup>        | 1.3x10 <sup>+2</sup>        | 1.5x10 <sup>+2</sup>        | 1.1x10 <sup>+2</sup>        | 1.4x10 <sup>+2</sup>        | 1.5x10 <sup>+2</sup>        | 1.6x10 <sup>+2</sup>        | 1.3x10 <sup>+2</sup>       |                            |
|              | (2.1x10 <sup>+1</sup> )    | (2.3x10 <sup>+1</sup> )     | (3.5x10 <sup>+1</sup> )     | (4.6x10 <sup>+1</sup> )     | (3.7x10 <sup>+1</sup> )     | (1.4x10 <sup>+1</sup> )     | (1.9x10 <sup>+1</sup> )     | (2.9x10 <sup>+1</sup> )     | (3.6x10 <sup>+1</sup> )    |                            |
|              | 5.7x10 <sup>+1</sup> ;     | 6.7x10 <sup>+1</sup> ;      | 7.4x10 <sup>+1</sup> ;      | 9.8x10 <sup>+1</sup> ;      | 6.0x10 <sup>+1</sup> ;      | 1.2x10 <sup>+2</sup> ;      | 1.2x10 <sup>+2</sup> ;      | 9.8x10 <sup>+1</sup> ;      | 5.7x10 <sup>+1</sup> ;     |                            |
|              | 1.3x10 <sup>+2</sup>       | 1.4x10 <sup>+2</sup>        | 2.0x10 <sup>+2</sup>        | 2.2x10 <sup>+2</sup>        | 1.6x10 <sup>+2</sup>        | 1.6x10 <sup>+2</sup>        | 1.8x10 <sup>+2</sup>        | 2.0x10 <sup>+2</sup>        | 2.2x10 <sup>+2</sup>       |                            |
| As           | 6.4x10 <sup>-2</sup>       | 3.3x10 <sup>-2</sup>        | 1.3x10 <sup>-1</sup>        | 2.2x10 <sup>-1</sup>        | 4.2x10 <sup>-2</sup>        | 1.1x10 <sup>-1</sup>        | 2.6x10 <sup>-1</sup>        | 6.0x10 <sup>-1</sup>        | 1.8x10 <sup>-1</sup>       |                            |
|              | (5.0x10 <sup>-2</sup> )    | (3.1x10 <sup>-2</sup> )     | (5.4x10 <sup>-2</sup> )     | (6.7x10 <sup>-2</sup> )     | (5.7x10 <sup>-2</sup> )     | (4.9x10 <sup>-2</sup> )     | (6.0x10 <sup>-2</sup> )     | (4.4x10 <sup>-1</sup> )     | (2.3x10 <sup>-1</sup> )    |                            |
|              | 2.3x10 <sup>-2</sup> ;     | 2.3x10 <sup>-2</sup> ;      | 2.3x10 <sup>-2</sup> ;      | 1.4x10 <sup>-1</sup> ;      | 2.3x10 <sup>-2</sup> ;      | 4.4x10 <sup>-2</sup> ;      | 2.2x10 <sup>-1</sup> ;      |                             |                            |                            |
|              | 1.7x10 <sup>-1</sup>       | 1.2x10 <sup>-1</sup>        | 2.0x10 <sup>-1</sup>        | 3.7x10 <sup>-1</sup>        | 1.9x10 <sup>-1</sup>        | 2.0x10 <sup>-1</sup>        | 3.7x10 <sup>-1</sup>        | 1.3x10 <sup>-1</sup> ; 1.6  | 2.3x10 <sup>-2</sup> ; 1.6 |                            |
| Cd           | 2.1x10 <sup>-3</sup> (0.0) | 2.1x10 <sup>-3</sup> (0.0)  | 2.6x10 <sup>-3</sup>        | 2.7x10 <sup>-3</sup>        | 8.1x10 <sup>-3</sup>        | 2.8x10 <sup>-3</sup>        | 3.1x10 <sup>-3</sup>        | 2.9x10 <sup>-3</sup>        | 3.3x10 <sup>-3</sup>       |                            |
|              |                            |                             | (1.4x10 <sup>-3</sup> )     | (1.3x10 <sup>-3</sup> )     | (6.7x10 <sup>-3</sup> )     | (2.2x10 <sup>-3</sup> )     | (1.5x10 <sup>-3</sup> )     | (2.3x10 <sup>-3</sup> )     | (3.2x10 <sup>-3</sup> )    |                            |
|              | 2.1x10 <sup>-3</sup> ;     | 2.1x10 <sup>-3</sup> ;      | 2.1x10 <sup>-3</sup> ;      | 2.1x10 <sup>-3</sup> ;      | 2.1x10 <sup>-3</sup> ;      | 2.1x10 <sup>-3</sup> ;      | 2.1x10 <sup>-3</sup> ;      | 2.1x10 <sup>-3</sup> ;      | 2.1x10 <sup>-3</sup> ;     |                            |
|              | 2.1x10 <sup>-3</sup>       | 2.1x10 <sup>-3</sup>        | 6.6x10 <sup>-3</sup>        | 5.6x10 <sup>-3</sup>        | 1.8x10 <sup>-2</sup>        | 9.0x10 <sup>-3</sup>        | 5.8x10 <sup>-3</sup>        | 8.9x10 <sup>-3</sup>        | 1.8x10 <sup>-2</sup>       |                            |
| Co           | 4.2x10 <sup>-3</sup>       | 5.8x10 <sup>-3</sup>        | 6.2x10 <sup>-3</sup>        | 1.7x10 <sup>-2</sup>        | 8.6x10 <sup>-3</sup>        | 1.1x10 <sup>-2</sup>        | 1.3x10 <sup>-2</sup>        | 1.2x10 <sup>-2</sup>        | 9.7x10 <sup>-3</sup>       |                            |
|              | (2.4x10 <sup>-3</sup> )    | (2.6x10 <sup>-3</sup> )     | (1.2x10 <sup>-3</sup> )     | (2.2x10 <sup>-2</sup> )     | (4.4x10 <sup>-3</sup> )     | (4.0x10 <sup>-3</sup> )     | (4.2x10 <sup>-3</sup> )     | (8.8x10 <sup>-3</sup> )     | (9.2x10 <sup>-3</sup> )    |                            |
|              | 2.1x10 <sup>-3</sup> ;     | 2.1x10 <sup>-3</sup> ;      | 5.0x10 <sup>-3</sup> ;      | 5.5x10 <sup>-3</sup> ;      | 4.3x10 <sup>-3</sup> ;      | 7.6x10 <sup>-3</sup> ;      | 7.3x10 <sup>-3</sup> ;      | 2.1x10 <sup>-3</sup> ;      | 2.1x10 <sup>-3</sup> ;     |                            |
|              | 8.5x10 <sup>-3</sup>       | 9.4x10 <sup>-3</sup>        | 8.7x10 <sup>-3</sup>        | 7.5x10 <sup>-2</sup>        | 1.8x10 <sup>-2</sup>        | 2.0x10 <sup>-2</sup>        | 2.0x10 <sup>-2</sup>        | 2.5x10 <sup>-2</sup>        | 7.5x10 <sup>-2</sup>       |                            |
| Cr           | 2.3x10 <sup>-2</sup> (0.0) | 2.3x10 <sup>-2</sup> (0.0)  | 4.2x10 <sup>-2</sup>        | 6.9x10 <sup>-2</sup>        | 3.9x10 <sup>-2</sup>        | 3.6x10 <sup>-2</sup>        | 2.3x10 <sup>-2</sup> (0.0)  | 3.3x10 <sup>-2</sup>        | 3.6x10 <sup>-2</sup>       |                            |
|              |                            |                             | (2.6x10 <sup>-2</sup> )     | (9.9x10 <sup>-2</sup> )     | (1.9x10 <sup>-2</sup> )     | (2.2x10 <sup>-2</sup> )     |                             | (1.5x10 <sup>-2</sup> )     | (3.8x10 <sup>-2</sup> )    |                            |
|              | 2.3x10 <sup>-2</sup> ;     | 2.3x10 <sup>-2</sup> ;      | 2.3x10 <sup>-2</sup> ;      | 2.3x10 <sup>-2</sup> ;      | 2.3x10 <sup>-2</sup> ;      | 2.3x10 <sup>-2</sup> ;      | 2.3x10 <sup>-2</sup> ;      | 2.3x10 <sup>-2</sup> ;      | 2.3x10 <sup>-2</sup> ;     |                            |
|              | 2.3x10 <sup>-2</sup>       | 2.3x10 <sup>-2</sup>        | 8.5x10 <sup>-2</sup>        | 3.3x10 <sup>-1</sup>        | 7.0x10 <sup>-2</sup>        | 7.6x10 <sup>-2</sup>        | 2.3x10 <sup>-2</sup>        | 6.0x10 <sup>-2</sup>        | 3.3x10 <sup>-1</sup>       |                            |
| Cu           | 3.8x10 <sup>-1</sup>       | 3.6x10 <sup>-1</sup>        | 3.8x10 <sup>-1</sup>        | 4.2x10 <sup>-1</sup>        | 4.7x10 <sup>-1</sup>        | 4.8x10 <sup>-1</sup>        | 4.0x10 <sup>-1</sup>        | 5.4x10 <sup>-1</sup>        | 4.3x10 <sup>-1</sup>       |                            |
|              | (2.3x10 <sup>-1</sup> )    | (1.3x10 <sup>-1</sup> )     | (1.9x10 <sup>-1</sup> )     | (8.0x10 <sup>-2</sup> )     | (3.3x10 <sup>-1</sup> )     | (2.3x10 <sup>-1</sup> )     | (1.6x10 <sup>-1</sup> )     | (1.6x10 <sup>-1</sup> )     | (2.0x10 <sup>-1</sup> )    |                            |
|              | 1.2x10 <sup>-1</sup> ;     | 2.1x10 <sup>-1</sup> ;      | 2.2x10 <sup>-1</sup> ;      | 2.9x10 <sup>-1</sup> ;      |                             |                             | 2.2x10 <sup>-1</sup> ;      | 4.4x10 <sup>-1</sup> ;      |                            |                            |
|              | 9.1x10 <sup>-1</sup>       | 5.4x10 <sup>-1</sup>        | 8.7x10 <sup>-1</sup>        | 5.6x10 <sup>-1</sup>        | 2.8x10 <sup>-1</sup> ; 1.3  | 2.7x10 <sup>-1</sup> ; 1.1  | 7.6x10 <sup>-1</sup>        | 9.6x10 <sup>-1</sup>        | 1.2x10 <sup>-1</sup> ; 1.3 |                            |
| Fe           | 4.5 (1.8)                  | 5.0 (1.2)                   | 3.6 (9.1x10 <sup>-1</sup> ) | 4.2 (1.4)                   | 4.7 (2.2)                   | 4.8 (9.9x10 <sup>-1</sup> ) | 4.6 (1.5)                   | 4.1 (6.1x10 <sup>-1</sup> ) | 4.4 (1.4)                  |                            |
|              | 2.6 ; 7.7                  | 3.3 ; 6.6                   | 2.0 ; 4.7                   | 2.5 ; 7.2                   | 2.5 ; 8.6                   | 3.3 ; 6.6                   | 2.3 ; 7.5                   | 2.9 ; 4.9                   | 2.0 ; 8.6                  |                            |
| Hg           | 1.4x10 <sup>-1</sup>       | 1.2x10 <sup>-1</sup>        | 3.2x10 <sup>-1</sup>        | 1.7x10 <sup>-1</sup>        | 2.0x10 <sup>-1</sup>        | 3.6x10 <sup>-1</sup>        | 2.2x10 <sup>-1</sup>        | 2.7x10 <sup>-1</sup>        | 2.3x10 <sup>-1</sup>       |                            |
|              | (4.8x10 <sup>-2</sup> )    | (7.2x10 <sup>-2</sup> )     | (1.4x10 <sup>-1</sup> )     | (6.3x10 <sup>-2</sup> )     | (1.9x10 <sup>-1</sup> )     | (1.3x10 <sup>-1</sup> )     | (9.2x10 <sup>-2</sup> )     | (1.9x10 <sup>-1</sup> )     | (1.5x10 <sup>-1</sup> )    |                            |
|              | 3.0x10 <sup>-2</sup> ;     | 3.8x10 <sup>-2</sup> ;      | 1.1x10 <sup>-1</sup> ;      | 7.3x10 <sup>-2</sup> ;      | 1.4x10 <sup>-2</sup> ;      | 1.9x10 <sup>-1</sup> ;      | 9.4x10 <sup>-2</sup> ;      | 3.7x10 <sup>-2</sup> ;      | 1.4x10 <sup>-2</sup> ;     |                            |
|              | 1.9x10 <sup>-1</sup>       | 2.9x10 <sup>-1</sup>        | 6.1x10 <sup>-1</sup>        | 2.9x10 <sup>-1</sup>        | 5.2x10 <sup>-1</sup>        | 6.0x10 <sup>-1</sup>        | 3.5x10 <sup>-1</sup>        | 5.4x10 <sup>-1</sup>        | 6.1x10 <sup>-1</sup>       |                            |
| Mn           | 2.0x10 <sup>-1</sup>       | 3.2x10 <sup>-1</sup>        | 3.6x10 <sup>-1</sup>        | 1.6x10 <sup>-1</sup>        | 2.3x10 <sup>-1</sup>        | 2.3x10 <sup>-1</sup>        | 2.0x10 <sup>-1</sup>        | 2.7x10 <sup>-1</sup>        | 2.5x10 <sup>-1</sup>       |                            |
|              | (1.2x10 <sup>-1</sup> )    | (3.1x10 <sup>-1</sup> )     | (2.5x10 <sup>-1</sup> )     | (5.7x10 <sup>-2</sup> )     | (1.8x10 <sup>-1</sup> )     | (8.7x10 <sup>-2</sup> )     | (9.2x10 <sup>-2</sup> )     | (1.5x10 <sup>-1</sup> )     | (1.8x10 <sup>-1</sup> )    |                            |

|                       |                             |                                                                                                   |                                                                                                   |                                                                                                   |                                                                                                   |                                                                                                   |                                                                                                   |                                                                                                   |                                                                                                   |                                                                                                   |
|-----------------------|-----------------------------|---------------------------------------------------------------------------------------------------|---------------------------------------------------------------------------------------------------|---------------------------------------------------------------------------------------------------|---------------------------------------------------------------------------------------------------|---------------------------------------------------------------------------------------------------|---------------------------------------------------------------------------------------------------|---------------------------------------------------------------------------------------------------|---------------------------------------------------------------------------------------------------|---------------------------------------------------------------------------------------------------|
|                       |                             | 6.6x10 <sup>-2</sup> ;<br>4.3x10 <sup>-1</sup>                                                    | 1.5x10 <sup>-1</sup> ; 1.2                                                                        | 2.3x10 <sup>-1</sup> ; 1.1                                                                        | 8.7x10 <sup>-2</sup> ;<br>2.7x10 <sup>-1</sup>                                                    | 8.2x10 <sup>-2</sup> ;<br>6.6x10 <sup>-1</sup>                                                    | 9.8x10 <sup>-2</sup> ;<br>3.8x10 <sup>-1</sup>                                                    | 1.2x10 <sup>-1</sup> ;<br>3.8x10 <sup>-1</sup>                                                    | 1.3x10 <sup>-1</sup> ;<br>5.5x10 <sup>-1</sup>                                                    | 6.6x10 <sup>-2</sup> ; 1.2                                                                        |
|                       | Ni                          | 1.9x10 <sup>-2</sup><br>(9.9x10 <sup>-3</sup> )<br>7.2x10 <sup>-3</sup> ;<br>3.4x10 <sup>-2</sup> | 1.3x10 <sup>-2</sup><br>(7.6x10 <sup>-3</sup> )<br>4.2x10 <sup>-3</sup> ;<br>2.8x10 <sup>-2</sup> | 5.3x10 <sup>-2</sup><br>(8.7x10 <sup>-2</sup> )<br>8.8x10 <sup>-3</sup> ;<br>2.4x10 <sup>-1</sup> | 4.6x10 <sup>-2</sup><br>(4.9x10 <sup>-2</sup> )<br>7.3x10 <sup>-3</sup> ;<br>1.6x10 <sup>-1</sup> | 4.1x10 <sup>-2</sup><br>(3.5x10 <sup>-2</sup> )<br>7.0x10 <sup>-3</sup> ;<br>1.1x10 <sup>-1</sup> | 4.9x10 <sup>-2</sup><br>(6.3x10 <sup>-2</sup> )<br>1.3x10 <sup>-2</sup> ;<br>2.2x10 <sup>-1</sup> | 3.2x10 <sup>-2</sup><br>(2.7x10 <sup>-2</sup> )<br>1.1x10 <sup>-2</sup> ;<br>8.6x10 <sup>-2</sup> | 5.5x10 <sup>-2</sup><br>(3.2x10 <sup>-2</sup> )<br>1.4x10 <sup>-2</sup> ;<br>9.4x10 <sup>-2</sup> | 3.8x10 <sup>-2</sup><br>(4.7x10 <sup>-2</sup> )<br>4.2x10 <sup>-3</sup> ;<br>2.4x10 <sup>-1</sup> |
|                       | Pb                          | 3.5x10 <sup>-3</sup><br>(1.6x10 <sup>-3</sup> )<br>2.1x10 <sup>-3</sup> ;<br>5.4x10 <sup>-3</sup> | 1.3x10 <sup>-2</sup><br>(1.1x10 <sup>-2</sup> )<br>4.1x10 <sup>-3</sup> ;<br>3.1x10 <sup>-2</sup> | 3.3x10 <sup>-3</sup><br>(1.7x10 <sup>-3</sup> )<br>2.1x10 <sup>-3</sup> ;<br>6.0x10 <sup>-3</sup> | 3.3x10 <sup>-2</sup><br>(3.6x10 <sup>-2</sup> )<br>1.1x10 <sup>-2</sup> ;<br>1.3x10 <sup>-1</sup> | 2.8x10 <sup>-2</sup><br>(1.5x10 <sup>-2</sup> )<br>8.0x10 <sup>-3</sup> ;<br>5.2x10 <sup>-2</sup> | 1.3x10 <sup>-2</sup><br>(8.7x10 <sup>-3</sup> )<br>5.9x10 <sup>-3</sup> ;<br>3.6x10 <sup>-2</sup> | 1.5x10 <sup>-2</sup><br>(1.5x10 <sup>-2</sup> )<br>4.2x10 <sup>-3</sup> ;<br>5.4x10 <sup>-2</sup> | 7.9x10 <sup>-3</sup><br>(5.0x10 <sup>-3</sup> )<br>2.1x10 <sup>-3</sup> ;<br>1.6x10 <sup>-2</sup> | 1.4x10 <sup>-2</sup><br>(1.8x10 <sup>-2</sup> )<br>2.1x10 <sup>-3</sup> ;<br>1.3x10 <sup>-1</sup> |
|                       | Se                          | 6.0x10 <sup>-2</sup><br>(4.9x10 <sup>-2</sup> )<br>2.3x10 <sup>-2</sup> ;<br>1.4x10 <sup>-1</sup> | 3.7x10 <sup>-1</sup><br>(2.0x10 <sup>-1</sup> )<br>2.3x10 <sup>-2</sup> ;<br>5.9x10 <sup>-1</sup> | 6.9x10 <sup>-1</sup><br>(2.3x10 <sup>-1</sup> )<br>3.2x10 <sup>-1</sup> ; 1.1                     | 2.7x10 <sup>-1</sup><br>(1.1x10 <sup>-1</sup> )<br>1.3x10 <sup>-1</sup> ;<br>4.7x10 <sup>-1</sup> | 4.0x10 <sup>-1</sup><br>(1.3x10 <sup>-1</sup> )<br>2.5x10 <sup>-1</sup> ;<br>6.0x10 <sup>-1</sup> | 2.0x10 <sup>-1</sup><br>(5.5x10 <sup>-2</sup> )<br>1.4x10 <sup>-1</sup> ;<br>3.3x10 <sup>-1</sup> | 7.1x10 <sup>-1</sup><br>(8.0x10 <sup>-1</sup> )<br>1.2x10 <sup>-1</sup> ; 2.8                     | 4.2x10 <sup>-1</sup><br>(1.9x10 <sup>-1</sup> )<br>1.1x10 <sup>-1</sup> ;<br>6.4x10 <sup>-1</sup> | 3.9x10 <sup>-1</sup><br>(3.7x10 <sup>-1</sup> )<br>2.3x10 <sup>-2</sup> ; 2.8                     |
|                       | Zn                          | 2.3x10 <sup>+1</sup> (2.1)<br>2.0x10 <sup>+1</sup> ;<br>2.6x10 <sup>+1</sup>                      | 2.7x10 <sup>+1</sup> (4.3)<br>1.9x10 <sup>+1</sup> ;<br>3.2x10 <sup>+1</sup>                      | 2.6x10 <sup>+1</sup> (2.4)<br>2.3x10 <sup>+1</sup> ;<br>3.1x10 <sup>+1</sup>                      | 3.0x10 <sup>+1</sup> (7.9)<br>2.0x10 <sup>+1</sup> ;<br>4.2x10 <sup>+1</sup>                      | 2.6x10 <sup>+1</sup> (4.6)<br>2.1x10 <sup>+1</sup> ;<br>3.3x10 <sup>+1</sup>                      | 2.6x10 <sup>+1</sup> (4.7)<br>2.2x10 <sup>+1</sup> ;<br>3.7x10 <sup>+1</sup>                      | 2.7x10 <sup>+1</sup> (4.0)<br>2.2x10 <sup>+1</sup> ;<br>3.4x10 <sup>+1</sup>                      | 2.8x10 <sup>+1</sup> (4.8)<br>2.3x10 <sup>+1</sup> ;<br>3.6x10 <sup>+1</sup>                      | 2.7x10 <sup>+1</sup> (4.7)<br>1.9x10 <sup>+1</sup> ;<br>4.2x10 <sup>+1</sup>                      |
| Swimbladder parasites | <i>A. crassus</i> Abundance | 1.6 (2.4)<br>0 ; 6                                                                                | 6.5 (7.2)<br>0 ; 2.5x10 <sup>1</sup>                                                              | 8.9 (9.1)<br>0 ; 3.1x10 <sup>1</sup>                                                              | 2.4 (2.5)<br>0 ; 7                                                                                | 8 (1x10 <sup>1</sup> )<br>0 ; 3.3x10 <sup>1</sup>                                                 | 1.1x10 <sup>1</sup> (9.1)<br>0 ; 2.4x10 <sup>1</sup>                                              | 5.7 (6.8)<br>0 ; 2.1x10 <sup>1</sup>                                                              | 3.3x10 <sup>-1</sup> (5x10 <sup>-1</sup> )<br>0 ; 1                                               | 5.6 (7.6)<br>0 ; 3.3x10 <sup>1</sup>                                                              |

POP: persistent organic pollutants (ng·g<sup>-1</sup> wet weight), TEs: trace elements (µg·g<sup>-1</sup> dry weight), n: eel number. *A. crassus* Abundance: number of nematodes in swimbladders. The data show given for each contaminant show, on the first line, the mean (± standard deviation) and, on the second line, the minimum and maximum as “min ; max” for each catchment.

**Table S2.** Settings and total pseudo-variance outputs of GLP and GCP random forest models. Related to Figure 2 in the main text.

|        |          | GLP models        |      |      |                   |                |                        |                |                   | GCP models |      |                   |                |                        |                |  |  |
|--------|----------|-------------------|------|------|-------------------|----------------|------------------------|----------------|-------------------|------------|------|-------------------|----------------|------------------------|----------------|--|--|
|        |          | Model calibration |      |      | All predictors    |                | Significant predictors |                | Model calibration |            |      | All predictors    |                | Significant predictors |                |  |  |
| Traits | <i>n</i> | ntree             | mtry | node | N <sub>pred</sub> | R <sup>2</sup> | N <sub>pred</sub>      | R <sup>2</sup> | ntree             | mtry       | node | N <sub>pred</sub> | R <sup>2</sup> | N <sub>pred</sub>      | R <sup>2</sup> |  |  |
| TL     | 75       | 400               | 1    | 8    | 5                 | 13.9           | 5                      | 13.9           | 500               | 14         | 25   | 42                | 45.1           | 9                      | 38.8           |  |  |
| TW     | 75       | 450               | 1    | 2    | 5                 | 18.3           | 4                      | 18.3           | 450               | 14         | 11   | 42                | 45.8           | 12                     | 38.6           |  |  |
| GR     | 75       | 300               | 1    | 7    | 5                 | 24.8           | 5                      | 24.8           | 250               | 14         | 23   | 42                | 29.6           | 9                      | 24.8           |  |  |
| AGE    | 75       | 600               | 1    | 11   | 5                 | 23.1           | 5                      | 23.1           | 300               | 14         | 21   | 42                | 30.5           | 4                      | 24.4           |  |  |
| K      | 75       | 250               | 5    | 4    | 5                 | 30             | 5                      | 30             | 350               | 14         | 4    | 42                | 28             | 14                     | 26             |  |  |
| P11KT  | 62       | 250               | 5    | 4    | 5                 | 37.2           | 2                      | 37.2           | 300               | 14         | 10   | 42                | 39.3           | 8                      | 34.4           |  |  |
| OI     | 75       | 550               | 1    | 5    | 5                 | 39.6           | 5                      | 39.6           | 500               | 14         | 13   | 42                | 43.5           | 9                      | 34.8           |  |  |
| DTI    | 75       | 450               | 1    | 9    | 5                 | 9.3            | 5                      | 9.3            | 450               | 14         | 8    | 42                | 22.4           | 5                      | 14.8           |  |  |
| GSI    | 75       | 300               | 1    | 2    | 5                 | 9.9            | 3                      | 9.9            | 250               | 2          | 19   | 42                | 20.9           | 8                      | 11.3           |  |  |
| LIPIDS | 75       | 500               | 1    | 6    | 5                 | 42.4           | 4                      | 42.4           | 500               | 14         | 25   | 42                | 48.7           | 7                      | 39.9           |  |  |
| RP     | 75       | 250               | 1    | 9    | 5                 | 35.3           | 5                      | 35.3           | 450               | 14         | 25   | 42                | 54.4           | 9                      | 45.3           |  |  |

GLP: geographic and local predictors; GCP: geographic, local and contamination predictors; n: number of eels in models; ntree: number of decision regression trees; mtry: number of predictors randomly selected at each node among whole predictors; node: maximum number of nodes; N<sub>pred</sub>: number of total or significant predictors in models; R<sup>2</sup>: total pseudo-variance (%).

**Table S3.** Design of bioaccumulation scenarios. Related to Figures 5 and 6 in the main text.

| Contaminant groups | Compound | Concentration threshold |      | Optimistic scenario |             | Pessimistic scenario |             | Bioaccumulation ratio shifts |     |      |
|--------------------|----------|-------------------------|------|---------------------|-------------|----------------------|-------------|------------------------------|-----|------|
|                    |          | Q25%                    | Q75% | min - max           | µ (SD)      | min - max            | µ (SD)      | min                          | µ   | max  |
| Muscular POPs      | BTBPE    | 0.01                    | 0.03 | 0.01 - 0.01         | 0.01 (0)    | 0.03 - 0.2           | 0.1 (0.04)  | 3                            | 10  | 18   |
|                    | HCB      | 0.3                     | 1    | 0.1 - 0.3           | 0.2 (0.05)  | 2.0 - 40.0           | 20 (10)     | 9.3                          | 110 | 360  |
|                    | PCBs     | 20                      | 200  | 5.0 - 7.0           | 10 (4)      | 300 - 8000           | 4000 (2000) | 17                           | 400 | 1700 |
|                    | DDTs     | 8                       | 50   | 1.0 - 7.0           | 4 (2)       | 50 - 200             | 100 (50)    | 7                            | 32  | 230  |
|                    | As       | 0.1                     | 0.3  | 0.03 - 0.1          | 0.07 (0.03) | 0.3 - 1              | 0.7 (0.2)   | 2.3                          | 9.6 | 42   |

|                 |    |       |       |               |                |              |              |                |               |              |
|-----------------|----|-------|-------|---------------|----------------|--------------|--------------|----------------|---------------|--------------|
| Gonadic<br>TEs  | Cd | 0.01  | 0.05  | 0.002 - 0.01  | 0.008 (0.003)  | 0.05 - 0.3   | 0.2 (0.07)   | 3.8            | 23            | 140          |
|                 | Cr | 0.06  | 0.1   | 0.02 - 0.05   | 0.04 (0.009)   | 0.1 - 0.9    | 0.5 (0.2)    | 2              | 12            | 37           |
|                 | Cu | 0.7   | 1     | 0.4 - 0.7     | 0.6 (0.08)     | 1.0 - 3.0    | 2 (0.7)      | 1.7            | 3.9           | 7.8          |
|                 | Fe | 10    | 30    | 7.0 - 10.0    | 9 (1)          | 30 - 50      | 40 (6)       | 2.3            | 4.5           | 7.7          |
|                 | Mn | 0.2   | 0.4   | 0.1 - 0.2     | 0.2 (0.03)     | 0.4 - 0.8    | 0.6 (0.1)    | 1.5            | 3.4           | 6.7          |
|                 | Ni | 0.02  | 0.1   | 0.006 - 0.02  | 0.02 (0.005)   | 0.2 - 0.8    | 0.5 (0.2)    | 6.4            | 30            | 150          |
|                 | Pb | 0.002 | 0.01  | 0.002 - 0.002 | 0.002 (0)      | 0.02 - 0.2   | 0.1 (0.04)   | 8.6            | 45            | 77           |
|                 | Se | 0.6   | 1     | 0.2 - 0.5     | 0.4 (0.09)     | 1.0 - 3.0    | 2 (0.6)      | 2              | 5.4           | 14           |
|                 | Zn | 60    | 90    | 30 - 60       | 50 (8)         | 90 - 200     | 100 (20)     | 1.5            | 2.6           | 4.9          |
| Hepatic TEs     | As | 0.02  | 0.2   | 0.002 - 0.02  | 0.01 (0.006)   | 0.2 - 1      | 0.8 (0.4)    | 7.1            | 60            | 660          |
|                 | Cd | 0.2   | 1     | 0.04 - 0.2    | 0.1 (0.04)     | 1.0 - 5.0    | 3 (1)        | 7.6            | 31            | 140          |
|                 | Co | 0.04  | 0.2   | 0.02 - 0.04   | 0.03 (0.007)   | 0.2 - 0.9    | 0.6 (0.2)    | 4.2            | 17            | 43           |
|                 | Cr | 0.02  | 0.06  | 0.02 - 0.02   | 0.02 (0)       | 0.06 - 0.2   | 0.1 (0.03)   | 2.7            | 4.8           | 7.1          |
|                 | Cu | 20    | 50    | 3.0 - 20.0    | 10 (6)         | 60 - 100     | 90 (20)      | 2.3            | 6.8           | 45           |
|                 | Fe | 300   | 700   | 60 - 300      | 200 (60)       | 700 - 2000   | 1000 (300)   | 2.7            | 7.9           | 31           |
|                 | Mn | 3     | 4     | 1.0 - 3.0     | 2 (0.5)        | 4.0 - 8.0    | 6 (0.9)      | 1.5            | 3             | 6            |
|                 | Ni | 0.02  | 0.05  | 0.007 - 0.02  | 0.01 (0.004)   | 0.06 - 1     | 0.5 (0.3)    | 2.7            | 38            | 140          |
|                 | Pb | 0.04  | 0.2   | 0.008 - 0.04  | 0.02 (0.008)   | 0.3 - 1      | 0.7 (0.3)    | 7.1            | 33            | 150          |
|                 | Se | 8     | 20    | 3.0 - 8.0     | 5 (1)          | 20 - 30      | 20 (6)       | 2              | 4.9           | 13           |
|                 | Zn | 100   | 200   | 60 - 100      | 80 (10)        | 200 - 200    | 200 (20)     | 1.6            | 2.4           | 3.8          |
| Muscular<br>TEs | As | 0.02  | 0.2   | 0.02 - 0.02   | 0.02 (0)       | 0.2 - 2      | 0.9 (0.4)    | 9.9            | 39            | 69           |
|                 | Cd | 0.002 | 0.002 | 0.002 - 0.002 | 0.002 (0)      | 0.002 - 0.02 | 0.01 (0.005) | 1.1            | 4.9           | 8.6          |
|                 | Cr | 0.02  | 0.02  | 0.02 - 0.02   | 0.02 (0)       | 0.05 - 0.3   | 0.2 (0.08)   | 2.1            | 8             | 13           |
|                 | Cu | 0.3   | 0.5   | 0.1 - 0.3     | 0.2 (0.05)     | 0.5 - 1      | 0.9 (0.2)    | 1.7            | 4.5           | 10           |
|                 | Fe | 3     | 5     | 2.0 - 3.0     | 3 (0.4)        | 5.0 - 9.0    | 7 (1)        | 1.5            | 2.5           | 4.3          |
|                 | Hg | 0.1   | 0.3   | 0.02 - 0.1    | 0.07 (0.03)    | 0.3 - 0.6    | 0.5 (0.08)   | 2.6            | 6.9           | 40           |
|                 | Mn | 0.2   | 0.3   | 0.07 - 0.1    | 0.1 (0.02)     | 0.3 - 1      | 0.7 (0.2)    | 2.1            | 6.8           | 18           |
|                 | Ni | 0.01  | 0.05  | 0.004 - 0.01  | 0.008 (0.002)  | 0.05 - 0.2   | 0.1 (0.05)   | 4.5            | 18            | 57           |
|                 | Pb | 0.005 | 0.02  | 0.002 - 0.005 | 0.003 (0.0007) | 0.02 - 0.1   | 0.07 (0.03)  | 4.1            | 20            | 60           |
|                 | Se | 0.2   | 0.6   | 0.02 - 0.2    | 0.1 (0.04)     | 0.6 - 3      | 2 (0.6)      | 3.2            | 17            | 110          |
|                 | Zn | 20    | 30    | 20 - 20       | 20 (1)         | 30 - 40      | 40 (3)       | 1.3            | 1.7           | 2.2          |
| <b>μ (SD)</b>   |    |       |       |               |                |              |              | <b>4 (3.3)</b> | <b>28.6</b>   | <b>123</b>   |
|                 |    |       |       |               |                |              |              |                | <b>(67.2)</b> | <b>(298)</b> |

POP: persistent organic pollutants (ng·g<sup>-1</sup> wet weight), TEs: trace elements (μg·g<sup>-1</sup> dry weight). The data show the average (μ ± SD, standard deviation) and minimum and maximum (min – max) of contaminants concentrations for optimistic and pessimistic scenarios (one significant digit is displayed). The concentration thresholds for simulation of optimistic and pessimistic scenarios are respectively bounded from the Q0% – Q25% and Q75% – Q100% quartiles of the observed concentrations measured in the sampled female silver eels. Bioaccumulation ratio shifts represent the ratio of minimum (min), average (μ) and maximum (max) concentrations values between the two scenarios.

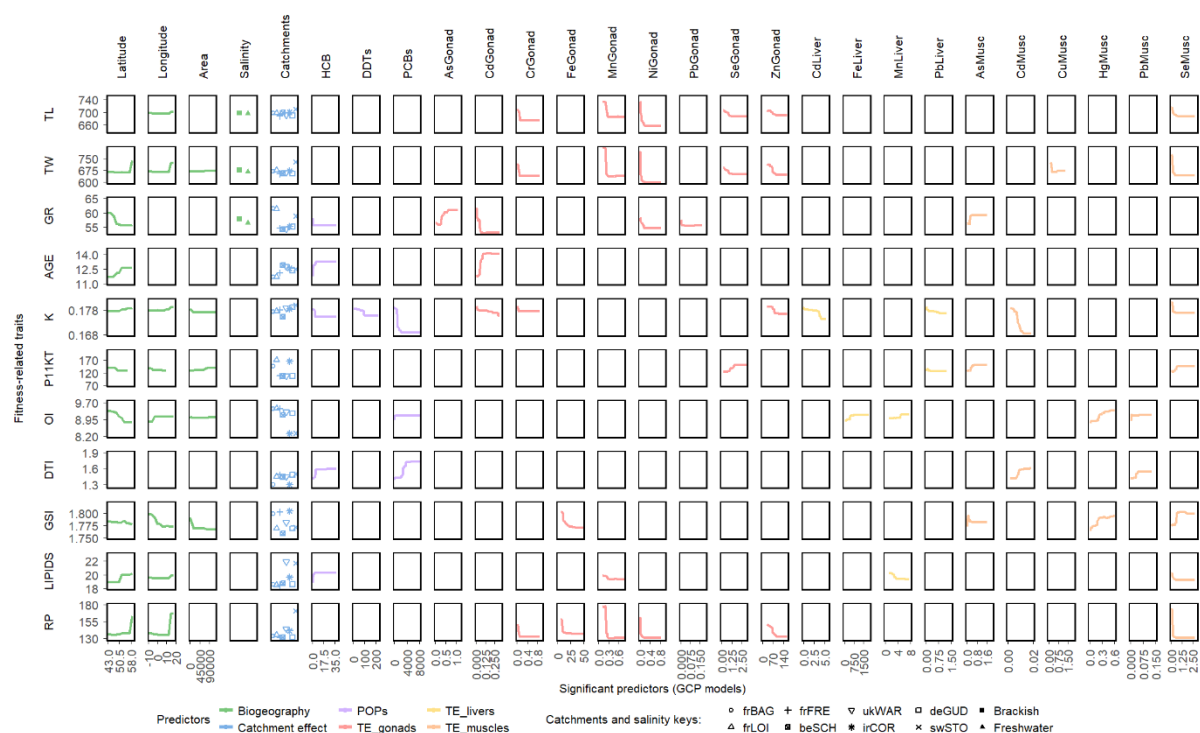

**Figure S1.** The marginal effect of geographic, local and contamination predictors (GCP) on the female silver eel fitness-related traits. Related to Figure 4. Each plot shows partial dependence of significant predictors after permutation test ( $n = 75$  silver eels, 62 for P11KT trait). Biogeographic predictors include latitude, longitude, catchment area and salinity. The local predictor represents the site effect of each catchment. Contaminants include POPs (persistent organic pollutants) in muscles (labelled “Musc”) and TEs (trace elements) in gonads, livers and muscles. TL: total length at silvering (mm), TW: total weight (g), GR: growth rate ( $\text{mm}\cdot\text{year}^{-1}$ ), AGE: estimated age (year), K: Fulton condition index (no unit), P11KT: plasma 11-ketotestosterone ( $\text{pg}\cdot\text{ml}^{-1}$ ), OI: Pankhurst’s ocular index (%), DTI: digestive tract index (%), GSI: gonado-somatic index (%), LIPIDS: muscular lipid content (%), RP: reproductive potential index (g of eggs). Empty cells correspond to non-significant predictors.

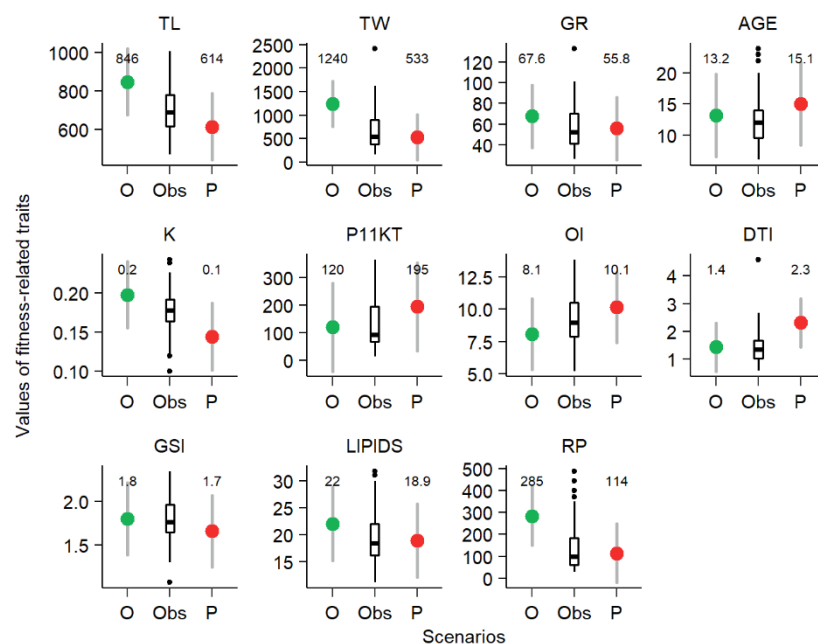

**Figure S2.** Distribution of fitness-related traits of female silver eels across an increasing bioaccumulation gradient. Related to Figure 5. Traits were predicted from geographic, local and contamination predictors (GCP models) in optimistic (label O, green dots) and pessimistic (label P, red dots) scenarios of contamination (see methods section) and were compared to the observed situation (label Obs, boxplot). The mean predicted values of traits and the mean confidence intervals (upper and lower, grey segments) of OOB prediction (95%) are both displayed. TL: total length at silvering (mm), TW: total weight (g), GR: growth rate (mm·year<sup>-1</sup>), AGE: estimated age (year), K: Fulton condition index (no unit), P11KT: plasma 11-ketotestosterone (pg·ml<sup>-1</sup>), OI: Pankhurst's ocular index (%), DTI: digestive tract index (%), GSI: gonado-somatic index (%), LIPIDS: muscular lipid content (%), RP: reproductive potential index (g of eggs). Empty cells correspond to non-significant predictors.
